# Supplementary material
Source: PubMed Central journal article supplement (PMC6873195)
Supplement: supp_RA119.009409_152920_2_supp_405835_pyyd9w.pdf [file supp_RA119.009409_152920_2_supp_405835_pyyd9w.pdf]

## **Supporting Information**

### **FOXO1 transcription factor regulates chondrogenic differentiation through transforming growth factor $\beta$ 1 signaling**

Ichiro Kurakazu, Yukio Akasaki, Mitsumasa Hayashida, Hidetoshi Tsushima, Norio Goto,  
Takuya Sueishi, Masakazu Toya, Masanari Kuwahara, Ken Okazaki, Tomas Duffy,  
Martin K. Lotz, and Yasuharu Nakashima

List of contents:

Supplementary tables: S1 and S2

Supplementary figure: S1

**Table S1.** Primer sequences used for real-time RT-PCR

| Gene                   | Forward (5'-3')         | Reverse (5'-3')         |
|------------------------|-------------------------|-------------------------|
| <i>Mouse 18s</i>       | GTAACCCGTTGAACCCCAT     | CCATCCAATCGGTAGTAGCG    |
| <i>Mouse Foxo1</i>     | AAGAGCGTGCCCTACTTCAA    | TGCTGTGAAGGGACAGATTG    |
| <i>Mouse Foxo3</i>     | TCCCAGATCTACGAGTGGATGG  | CCTTCATTCTGAACGCGCAT    |
| <i>Mouse Foxo4</i>     | GAGCCAGATCCCTGAGTCAC    | GGCTCAAGGAGGAAAAGTGGA   |
| <i>Mouse Sox9</i>      | GAGGCCACGGAACAGACTCA    | CAGCGCCTTGAAGATAGCATT   |
| <i>Mouse Col2a1</i>    | CGAGTGGAAGAGCGGAGACT    | AACTTTCATGGCGTCCAAGGT   |
| <i>Mouse Acan</i>      | GAAGAGCCTCGAATCACCTG    | ATCCTGGGCACATTATGGAA    |
| <i>Mouse Coll0a1</i>   | TAAGAACGGCACGCCTACGA    | TGATTGCACTCCCTGAAGCC    |
| <i>Mouse p21</i>       | GACAAGAGGCCAGTACTTC     | GCTTGGAGTGATAGAAATCTGTC |
| <i>Mouse p27</i>       | CAGACGTAAACAGCTCCGAATTA | GGCAGATGGTTTAAGAGTGCC   |
| <i>Mouse cyclin G2</i> | AGTATTCTTCGCCTCGCTGC    | AGAGTCCTCACTTTCCTTCCG   |
| <i>Human GAPDH</i>     | GGTGAAGGTCGGAGTCAACGGA  | GAGGGATCTCGCTCCTGGAAGA  |
| <i>Human FOXO1</i>     | AAGAGCGTGCCCTACTTCAA    | CTGTTGTTGTCCATGGATGC    |
| <i>Human SOX9</i>      | AGACCTTTGGGCTGCCTTAT    | TAGCCTCCCTCACTCCAAGA    |
| <i>Human COL2A1</i>    | CAACACTGCCAACGTCCAGAT   | CTGCTTCGTCCAGATAGGCAAT  |
| <i>Human ACAN</i>      | AGTCCTCAAGCCTCCTGTACTCA | CGGGAAGTGGCGGTAACA      |

**Table S2.** Primer sequences used for semiquantitative RT-PCR in ChIP assay

| Gene                | Forward (5'-3')       | Reverse (5'-3')       |
|---------------------|-----------------------|-----------------------|
| <i>p21 promoter</i> | GAGGTGAGGCCTCCTTCATT  | TAACAGGAAAGACAGACGGGT |
| negative control    | CCATGCTTCCTGACCAACTCT | GTGCCAGCTTTGAGGTTTCAG |

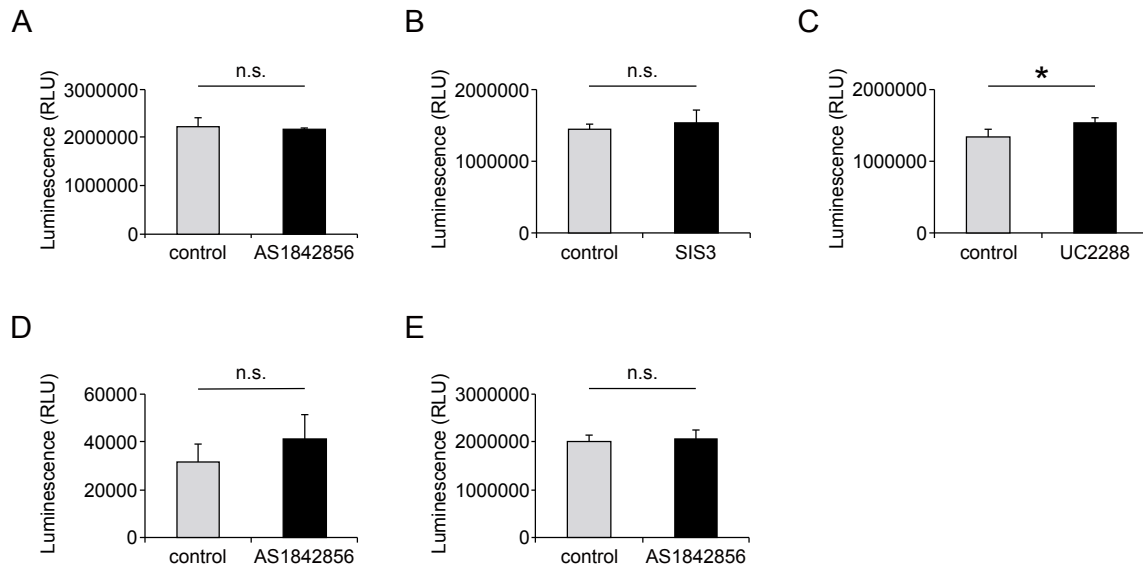

**Figure S1.** Chemical inhibitors including AS1842856, SIS3, and UC2288 did not decrease cell viabilities. Cell viabilities were analyzed using the CellTiter-Glo assay. **(A)** ATDC5 cells were incubated with or without AS1842856 (0.1  $\mu$ M) for 28 days; n=5. **(B)** ATDC5 cells were incubated with or without SIS3 (3  $\mu$ M) for 14 days; n=4. **(C)** ATDC5 cells were incubated with or without UC2288 (2.5  $\mu$ M) for 14 days; n=4. **(D)** Mesenchymal cells from mouse limb buds were incubated with or without AS1842856 (0.1  $\mu$ M) for 5 days; n=4. **(E)** hMSCs were incubated with or without AS1842856 (0.1  $\mu$ M) for 21 days; n=5. Data are presented as means  $\pm$  SD. Statistical analysis was performed using Wilcoxon's rank-sum test. \* $P$ <0.05.
